1 **Prefrontal Cortex Definitions and Their Use in Distinguishing Pornography**

2 **Addicted Juveniles**

3  
4 Pukovisa Prawiroharjo<sup>1\*</sup>; Rizki Edmi Edison<sup>2</sup>; Hainah Ellydar<sup>3</sup>; Peter Pratama<sup>4</sup>; Sitti  
5 Evangeline Imelda Suaidy<sup>3</sup>; Nya' Zata Amani<sup>3</sup>; Diavitri Carissima<sup>3,5</sup>; Ghina Faradisa  
6 Hatta<sup>4</sup>

7

8 <sup>1</sup> Neurology Department, Division of Neurobehavior, Faculty of Medicine,  
9 Universitas Indonesia/Cipto Mangokusumo Hospital, Jakarta, Indonesia

10

11 <sup>2</sup> Neuroscience Center, Universitas Muhammadiyah Prof. Dr. Hamka, Jakarta,  
12 Indonesia

13

14 <sup>3</sup> Yayasan Kita dan Buah Hati, Bekasi, Indonesia

15

16 <sup>4</sup> Independent scholar, Jakarta, Indonesia

17

18 <sup>5</sup> Faculty of Psychology, Universitas Islam Negeri Syarif Hidayatullah, Jakarta,  
19 Indonesia

20

21 \*Corresponding author

22 E-mail: pukovisa@ui.ac.id

23 **Funding sources**

24 This work was supported in part by Indonesian Ministry of Women's Empowerment  
25 and Child Protection (government-sponsored) and PuP gratefully acknowledges  
26 additional funding by LPDP for the Beasiswa Untuk Dosen Indonesia Luar Negeri  
27 2018-2021 scholarship (201711220411922). This study was funded without  
28 involvement of external funders in study design, data collection and analysis,  
29 decision to publish, or preparation of the manuscript.

30

31 **Competing interest**

32 The authors declare no competing interest exists. This preprint reports new research that has not been certified by peer review and should not be used to guide clinical practice.

33 **Manuscript details**

34 Character count for the title: 92 characters (with spaces)

35 Word count for the abstract: 221 words

36 Word count for the text: 2,345 words

37 Numbers of tables and figures: 3 tables and 1 figure

38 Number of references: 32

39

40 Rizki Edmi Edison [rizkiedmiedison@uhamka.ac.id](mailto:rizkiedmiedison@uhamka.ac.id) |

41 Hainah Ellydar [ellyrisman@yahoo.com](mailto:ellyrisman@yahoo.com) |

42 Peter Pratama [peter.pratama88@gmail.com](mailto:peter.pratama88@gmail.com) |

43 Sitti Evangeline Imelda Suaidy [evasuaidy@gmail.com](mailto:evasuaidy@gmail.com) |

44 Nya' Zata Amani [nyazataamani@gmail.com](mailto:nyazataamani@gmail.com) |

45 Diavitri Carissima [dcarissima@yahoo.com](mailto:dcarissima@yahoo.com) |

46

47

48 **ABSTRACT**

49 **Background and aims:** Increasing popularity of Internet has exposed our children  
50 pornography addiction. As in other types of addiction, it affects a brain region known  
51 as prefrontal cortex (PFC), which is important in executive functions and inhibitory  
52 control. However, this region was loosely defined, and there was no consensus for  
53 that definition. We aimed to use volumetric MRI in finding the defining region of  
54 PFC which would be suitable in distinguishing pornography addicted juveniles.

55 **Methods:** We enrolled 30 juveniles (12-16 y.o.) consisting of 15 pornography  
56 addiction and 15 non-addiction subjects. We proposed several models of PFC  
57 definition from mix-and-matched subregions, consisting of orbitofrontal (OFC),  
58 inferior frontal gyrus (IFG; pars orbitalis, opercularis, and triangularis), dorsolateral  
59 PFC (DLPFC), and anterior cingulate (ACC). Suitable PFC definition was defined as  
60 models which volume statistically different between both groups. Brain volumetric  
61 was measured using 3D-T1 3T MRI images and analyzed using FreeSurfer® for  
62 automatic cortical reconstruction and brain segmentation (recon-all command).

63 **Results:** We found significant differences between groups in 6 models, which  
64 mainly included OFC, ACC, and DLPFC, with models devoid of DLPFC had lowest  
65 mean differences.

66 **Conclusion:** The most suitable definition of PFC for pornography addiction study  
67 should consist of OFC, ACC, and especially DLPFC. Inferior frontal gyrus pars  
68 orbitalis was not necessary for this purpose, but may increase effect size if it is  
69 included.

70 **Keywords:** Addiction, Juvenile, Pornography, Functional Brain Imaging, Defining  
71 Area

72

73

74 **Abbreviation Lists**

75 PFC = prefrontal cortex, DLPFC = dorsolateral prefrontal cortex, IFG = inferior  
76 frontal gyrus, OFC = orbitofrontal cortex (OFC), ACC = anterior cingulate cortex,  
77 BPF‰ = Brain Parenchymal Fraction per mille

78

79 **Introduction**

80 Increasing popularity of Internet has exposed our children to various contents  
81 unsuitable for them. A survey in 2011–2012 by Indonesian Ministry of  
82 Communication and Informatics showed that more than 50% respondents (10-19  
83 y.o.) had been exposed to pornography, with 14% of them accessing pornographic  
84 websites voluntarily. Another survey in 2016 showed that ±97% elementary students  
85 of 4–6<sup>th</sup> grade in Jakarta and surrounding area had been exposed to pornography.[1]  
86 Addiction to pornography has been found on individuals as young as 10 and as old as  
87 22, but most of them are juveniles aged 13–18 years. Hilton and Watts, based on  
88 various neuroscientific studies of addictions, postulated that pornography addiction  
89 may cause not only chemical, but also anatomical and pathological changes, in the  
90 brain. Collectively called as hypofrontal syndromes, they signify disruption of  
91 “braking system” and may include compulsivity, impulsivity, emotional lability, and  
92 impaired judgment.[2] Similarly, American Society of Addiction Medicine, although  
93 not specifically mentioned pornography, treats behavioral addiction similar as  
94 substance addiction, in that both affects neurotransmission, hippocampal-cortical  
95 circuit interaction, brain reward structure, and triggers addictive behaviors.[3]  
96 Pornography addiction is also known as cause of marriage problems, social isolation,  
97 career loss,[4] and sexual crimes.[5,6]

98 Substance addiction are known to involve a region of brain called prefrontal cortex  
99 (PFC), which is important in executive functions and exerts inhibitory control on  
100 behavior (“braking system”).[7–9] Not surprisingly, this finding was consistent in  
101 pornography addiction despite there are far fewer neuroscientific studies regarding  
102 it.[10–12]

103 Numerous processes take place in PFC, contributing to neuropsychological functions  
104 such as emotion, cognitive, and behavior. Interruption in these processes might lead  
105 individuals to lose their self-control and salience, such in the case of addiction [9].

106 The highly integrated processes in PFC subregions themselves, together with other  
107 brain regions, makes it hard to tell specific function of individual subregion. As  
108 suspected, studies about injecting cocaine intravenously to cocaine-addicted  
109 individuals resulted in activation of numerous PFC subregions.[13,14]

110 However, currently the term “prefrontal cortex” is somewhat loosely defined. Fuster  
111 defined it simply as “cortex of the anterior pole of the mammalian brain”.[15] Some  
112 studies only mentioned three subregions of PFC (out of five circuits[16–18]) which  
113 are involved in addiction, i.e. dorsolateral prefrontal cortex (DLPFC), orbitofrontal  
114 cortex (OFC), and anterior cingulate gyrus (ACC).[7–9] Some other studies did not  
115 define it in details, which means it is hard to do precise systematic review or  
116 metaanalysis on this matter due to possible bias in definition of PFC. This might be  
117 somewhat mitigated in studies of substance addiction due to its sheer number of  
118 publications, but for pornography addiction, which has scarce evidences, this  
119 inconsistency may become a potential problem.

120 This study aimed to use volumetric MRI in finding the defining region of PFC which  
121 would be suitable in distinguishing pornography addicted juveniles, as attempt to  
122 standardize neuroscientific studies of pornography addiction in the future.

123 **Materials and Methods**

124 *Ethical consideration*

125 The study was approved by Health Research Ethical Committee of Faculty of  
126 Medicine Universitas Indonesia (Clearance No. 1155/UN2.F1/ETIK/2017) and  
127 conducted in accordance to Helsinki Declaration. No subject was confronted with  
128 pornographic material in this study. Informed consent was obtained from all  
129 participants, represented by respective parents.

130

131 *Participants*

132 As part of our previous study, we recruited 30 juveniles aged 12-16 years old during  
133 December 2017-February 2018, in various events held by YKBH in Bekasi,  
134 Indonesia. Using Pornography Addiction Test, a battery of neuropsychological test  
135 designed and validated by YKBH (see below),[19] we grouped the subjects into  
136 pornography addiction and non-addiction groups. Exclusion criteria were left-  
137 handed, verbal or language disorder, history of brain-related disorder or disease, head  
138 trauma, trauma during pregnancy or birth, developmental, psychological or  
139 neurological disorder, or mental illness.

140

141 *Pornography addiction screening*

142 Pornography Addiction Test is a self-reported questionnaire designed by expert  
143 psychologist of YKBH to use in evaluating pornography addiction on Indonesian  
144 juveniles. Briefly, the questionnaire consisted of 99 questions composed from  
145 various studies of pornography addiction, evaluating four dimensions: time,  
146 motivation to use pornography, problematic pornography use, and consequences of  
147 addiction. Pornography addiction was defined as weighted score of greater than or  
148 equal to 32.[19]

149 *Definition of PFC*

150 Previous studies mentioned five primary circuits of PFC: motor (originating in  
151 supplementary motor area), oculomotor (originating in frontal eye fields),  
152 dorsolateral prefrontal (DLPFC), orbitofrontal (OFC), and anterior cingulate (ACC).

153 The former two are involved in motor activities, while the latter three are involved in  
154 executive and behavioral activities[16–18] and thus were often associated with  
155 addiction.[8] Therefore, we would focus to these regions in this study.

156 We proposed several models of PFC definition consisting of various mix-and-  
157 matched subregions, detailed in **Table 1**. We also included two subregions currently  
158 arguable whether to or not to be considered as PFC regions: Broca's area and ACC.

159 Broca's area is anatomically located in inferior frontal gyrus (IFG), which is part of  
160 PFC, and a study indicated that IFG as a whole may have role in addiction,

161 especially in self-control and attention.[9] However Broca's area has been  
162 recognized for its exclusive role in speech.[20] On the other hand, ACC was

163 classically considered as part of limbic cortex (not frontal lobe), but is commonly  
164 referred to when discussing PFC. Goldstein and Volkow (2011) defined ACC as part  
165 of prefrontal cortex,[9] while Weinstein and Lejoyeux treated it separately.[21]

166 Classic definition of PFC would be model number C. All other models were mix-  
167 matched using the classic definition as pivot: model A-B pairs added Broca's area,  
168 E-F pairs excluded IFG pars orbitalis, G-H pairs excluded OFC, and I-J pairs  
169 excluded DLPFC. All even models (B, D, F, H, and J) included ACC while odd  
170 models did not.

171

172

173

174 **Table 1.** Investigated mixed-and-matched subregions (A-J) models defining  
175 prefrontal cortex

| Subregion              | Model Number |   |   |   |   |   |   |   |   |   |
|------------------------|--------------|---|---|---|---|---|---|---|---|---|
|                        | A            | B | C | D | E | F | G | H | I | J |
| OFC (lateral + medial) | ✓            | ✓ | ✓ | ✓ | ✓ | ✓ |   |   | ✓ | ✓ |
| IFG pars opercularis   | ✓            | ✓ |   |   |   |   |   |   |   |   |
| IFG pars triangularis  | ✓            | ✓ |   |   |   |   |   |   |   |   |
| IFG pars orbitalis     | ✓            | ✓ | ✓ | ✓ |   |   | ✓ | ✓ | ✓ | ✓ |
| SFG                    | ✓            | ✓ | ✓ | ✓ | ✓ | ✓ | ✓ | ✓ |   |   |
| MFG (rostral + caudal) | ✓            | ✓ | ✓ | ✓ | ✓ | ✓ | ✓ | ✓ |   |   |
| ACC (rostral + caudal) |              | ✓ |   | ✓ |   | ✓ |   | ✓ |   | ✓ |

OFC = orbitofrontal; IFG = inferior frontal gyrus; SFG = superior frontal gyrus;

MFG = middle frontal gyrus; ACC = anterior cingulate cortex

176

177 Due to limitation of FreeSurfer® labelling, we obtained volume of some regions

178 from mathematical addition: OFC from its lateral and medial parts, MFG from its

179 rostral and caudal parts, and ACC from its caudal and rostral parts. Additionally,

180 Broca's area was calculated from IFG pars opercularis and triangularis, while

181 DLPFC was calculated from SFG and MFG.[22]

182

183 *Definition of "suitable" PFC definition*

184 To find the suitable PFC definition for pornography addiction, we measured the

185 volume of each our model in both groups, then normalized them into Brain

186 Parenchymal Fraction (BPF, model volume divided by total intracranial

187 volume).[23] However, as the regions we investigated would result in too small BPF,



188 we had to use modified version of BPF by multiplying them with 1,000, resulting in  
189 what we dubbed as Brain Parenchymal Fraction per mill (BPF‰). We then  
190 compared the results between both groups. Significant statistical difference signified  
191 that corresponding model can be used to distinguish pornography addicts from non-  
192 addicts.

193

#### 194 *Brain imaging acquisition and processes*

195 To find volume of various brain subregions, we used MRI scans with GE-  
196 DISCOVERY® MR750 3 Tesla MRI scanner (8-channel-coil). We performed 3D  
197 T1-weighted sequence contiguous slice with the following parameters: repetition  
198 time = 8.3 sec; echo time = 3.2 sec; bandwidth = 31.3 kHz; field of view 24 x 24  
199 mm; slice thickness = 1 mm; no gap (0); matrix 256 x 256 (frequency x phase), NEX  
200 1; flip angle = 12°; time = 256 seconds. Images were then analyzed further using  
201 FreeSurfer® image analysis suite (<http://surfer.nmr.mgh.harvard.edu/>) for automatic  
202 cortical reconstruction and brain segmentation. FreeSurfer®'s N3 correction were  
203 also used to correct tissue signal inhomogeneity, to improve accuracy and robustness  
204 during cortical segmentation.[24] We obtained brain volume using the cross-  
205 sectional mode of recon-all flag -3T script of FreeSurfer version 6.0.[24] The script  
206 was used to improve diagnostic separability, accuracy, and reliability of cortical  
207 thickness by altering the parameters of FreeSurfer®'s internal N3 bias field  
208 correction.[24,25]

209

210 *Statistical analysis*

211 We used Mann-Whitney tests for comparison between groups. Statistical  
212 significance was assumed on  $p < 0.05$ . All statistical analysis was performed using R  
213 environment version 3.4.4 on Microsoft® Windows® 10.

214

## 215 **Results**

216 *Demographic Data*

217 We enrolled 30 subjects (15 non-addiction vs 15 addiction group). Mean age was  
218  $13.27 \pm 1.03$  vs  $13.80 \pm 1.26$  y.o. Both groups had matched age ( $p = 0.23$ ).

219

220 *BPF in Subregions*

221 Standing for DLPFC, only MFG showed significant lower BPF% in addiction group  
222 ( $p = 0.040$ , MD = -2.51). Calculated from SFG and MFG, DLPFC standalone did not  
223 result significant BPF% difference in addiction group ( $p = 0.071$ ), although it also  
224 showed rather lower BPF%, marked by largest negative mean difference (MD = -  
225 3,59) (**Table 2**).

226

227

228

229

230

231

232

233

234

235 **Table 2.** Region definition of investigated prefrontal cortex models.

236

| Subregion              | BPF%                    |                     | MD    | p      |
|------------------------|-------------------------|---------------------|-------|--------|
|                        | Non-addiction<br>(n=15) | Addiction<br>(n=15) |       |        |
| OFC (lateral + medial) | 20.93 ± 1.54            | 20.54 ± 1.22        | -0.39 | 0.468  |
| IFG Broca              | 12.66 ± 1.53            | 12.56 ± 1.18        | -0.10 | 0.852  |
| IFG Total              | 16.80 ± 1.81            | 16.55 ± 1.38        | -0.25 | 0.756  |
| SFG                    | 34.99 ± 1.99            | 33.91 ± 2.83        | -1.08 | 0.290  |
| MFG (rostral + caudal) | 36.15 ± 2.44            | 33.64 ± 2.96        | -2.51 | 0.040* |
| ACC (rostral + caudal) | 6.24 ± 0.77             | 5.80 ± 0.51         | -0.44 | 0.120  |
| DLPFC                  | 71.14 ± 3.73            | 67.55 ± 4.52        | -3.59 | 0.071  |

\* Statistically significant ( $p < 0.05$ )

OFC = orbitofrontal; IFG = inferior frontal gyrus; SFG = superior frontal gyrus;

MFG = middle frontal gyrus; ACC = anterior cingulate cortex

237

### 238 *BPF in Each Models*

239 From the suggested models, six of them were potential to be used in juvenile  
240 pornography addiction: model B ( $p = 0.044$ ), model C ( $p = 0.029$ ), model D ( $p =$   
241  $0.024$ ), model E ( $p = 0.040$ ), model F ( $p = 0.033$ ), and model H ( $p = 0.040$ ) (**Table**  
242 **3**). In all models, BPF% of addiction group was significantly lower, marked by the  
243 negative mean differences. Largest mean difference was that of model B (MD  
244 = -4.57), followed closely by model D (MD = -4.57). Model I and J had smallest  
245 mean differences. (**Fig 1**).

246

247

**Table 3.** PFC model comparison between juvenile pornography addiction and non-addiction group.

| Models | BPF%                 |                  | MD    | p      |
|--------|----------------------|------------------|-------|--------|
|        | Non-addiction (n=15) | Addiction (n=15) |       |        |
| A      | 108.88 ± 5.31        | 104.65 ± 5.78    | -4.23 | 0.065  |
| B      | 115.12 ± 5.66        | 110.44 ± 5.85    | -4.68 | 0.044* |
| C      | 96.21 ± 4.49         | 92.09 ± 5.05     | -4.12 | 0.029* |
| D      | 102.46 ± 4.83        | 97.89 ± 5.15     | -4.57 | 0.024* |
| E      | 92.07 ± 4.29         | 88.09 ± 4.83     | -3.98 | 0.040* |
| F      | 98.31 ± 4.61         | 93.89 ± 4.92     | -4.42 | 0.033* |
| G      | 75.28 ± 3.81         | 71.55 ± 4.71     | -3.73 | 0.059  |
| H      | 81.52 ± 4.13         | 77.34 ± 4.79     | -4.18 | 0.040* |
| I      | 25.07 ± 1.93         | 24.54 ± 1.44     | -0.53 | 0.395  |
| J      | 31.32 ± 2.31         | 30.34 ± 1.62     | -0.98 | 0.191  |

\* Statistically significant (p < 0.05)

Values are in mean ± SD, expressed in BPF%. MD = Mean Difference

248

249 **Fig 1.** Bar chart of mean difference comparison between non-addiction and addiction

250 group.

251 \*statistically significant (p < 0.05)

252

253 Additionally, as all significant models contained DLPFC, we performed a sub

254 analysis using only DLPFC of both groups, and found that the results were not

255 significant, both without and with ACC (p-value of 0.071 and 0.054, respectively).

256

257 **Discussion**

258 Model C as classic definition of PFC was able to significantly distinguish  
259 pornography addiction from non-addiction group, along with model B, D, E, F, and  
260 H. The significant model B but not A, and model H but not G, showed that ACC was  
261 an essential region to distinguish pornography addiction as these pairs only differed  
262 in ACC. Model C, which also differed to model D in ACC but was similarly  
263 significant, has smaller effect size[26] (mean difference of model C vs D = -4.12  
264 vs -4.57). ACC was reported to be important in craving,[27,28] self-control,  
265 inhibition, emotion regulation, motivation, self-awareness, attention, learning and  
266 memory. Disruption in ACC may result in impulsivity, compulsivity, and shifted  
267 motivation/attention into corresponding addiction.[9,29,30] Considering the  
268 important roles of ACC in addiction, we suggest that ACC would be included in  
269 future models of PFC on pornography addiction studies.

270 Significance in model C, compared to the not-significant model A, showed that IFG  
271 pars opercularis and triangularis, commonly referred as Broca's area, was not  
272 required to distinguish pornography addiction. Although model B had the largest  
273 effect size among all models, it was inconsistent with the non-significant model A  
274 (similar in Broca's area, differed in ACC which has been discussed above as  
275 essential region). Furthermore, model E-F pairs were similarly significant compared  
276 to model C-D pairs, even without IFG pars orbitalis, suggesting that this region was  
277 not an essential region. Our finding was in contrast with another study which  
278 claimed the role of IFG as a whole in addiction.[9] Additionally, comparison  
279 between model C-D pairs and E-F pairs suggested that addition of IFG pars orbitalis

280 may increase effect size. Further studies specifying this region are required to  
281 confirm our finding.

282 Meanwhile, model G, which was short of OFC compared to model C, was not  
283 statistically significant, suggesting importance of OFC in pornography addiction.

284 Model H (with ACC) was similarly significant compared to model D, but with  
285 smaller effect size (mean difference of model H vs D = -4.18 vs -4.57). OFC was  
286 known to be related to craving or pleasure expectation,[27] as well as emotion  
287 regulation/suppression, motivation, self-awareness, learning and memory.[9]

288 The most important PFC region in pornography addiction might be DLPFC (SFG  
289 and MFG combined). This was observed from the not-significant model I-J pairs,  
290 which were DLPFC-short of C-D pairs. DLPFC was known to have important role in  
291 self-control, motivation, attention, working memory, learning, and decision  
292 making.[9] DLPFC might fit the pornography addiction model in juveniles, however  
293 by itself it could not distinguish addiction from non-addiction groups, as observed  
294 from the sub analysis involving DLPFC only.

295 One limitation of this study was its cross-sectional design, which cannot investigate  
296 cause-and-effect relationship. Additionally, brains of juvenile subjects are still  
297 growing,[31] therefore might compensate underlying brain damage.[32] Further  
298 neuroscientific studies using the models described above, especially on longitudinal  
299 designs, are warranted to find the best definition of PFC suitable for pornography  
300 addiction studies.

301

## 302 **Conclusions**

303 The most suitable definition of prefrontal cortex for pornography addiction study in  
304 juvenile should consist of orbitofrontal cortex, anterior cingulate, and especially

305 dorsolateral PFC. Inferior frontal gyrus pars orbitalis was not necessary for this  
306 purpose, but may increase effect size if it is included. Further studies are required to  
307 confirm these findings.

308

### 309 **Additional information**

310 No additional information is available for this paper.

311

### 312 **Acknowledgements**

313 The authors would like to thank Alexandra Chessa, Resti Siti Saleha, Kevin Widjaja,  
314 and Nia Soewardi for their contributions in this paper.

315

### 316 **Authors' contribution**

317 Conceptualization: PuP, REE, HE. Investigation: PuP, REE, HE, SEIS, NZA, DC.

318 Methodology: PuP. Formal analysis: PeP, GFH. Resources: HE, SEIS, NZA, DC.

319 Writing (draft preparation, review, and editing): PeP, GFH, PuP. All authors critically  
320 reviewed and approved the final version of the manuscript.

321

322

### 323 **References**

324 [1] Yayasan Kita dan Buah Hati. Data on Indonesian children's exposure to  
325 pornography. [Data keterpaparan anak Indonesia terhadap pornografi]. Jakarta;  
326 2016.

327 [2] Hilton DL, Watts C. Pornography addiction: A neuroscience perspective. Surg  
328 Neurol Int. 2011;2(1):19.

329 [3] American Society of Addiction Medicine. American Society of Addiction  
330 Medicine public policy statement: Definition of addiction. Am Soc Addict

- 331 Med. 2011;1–8.
- 332 [4] Levine SB. What is sexual addiction? *J Sex Marital Ther.* 2010 Apr;36(3):261–  
333 75.
- 334 [5] Bryden DP, Grier MM. The search for rapists’ “real” motives. *J Crim Law*  
335 *Criminol.* 2011;101(1):171–278.
- 336 [6] Kheswa JG, Notole M. The impact of pornography on adolescent males’ sexual  
337 behaviour in the Eastern Cape, South Africa: A qualitative study. *Mediterr J*  
338 *Soc Sci.* 2014;5(20):2831.
- 339 [7] Volkow ND, Wang G-J, Fowler JS, Tomasi D, Telang F, Baler R. Addiction:  
340 Decreased reward sensitivity and increased expectation sensitivity conspire to  
341 overwhelm the brain’s control circuit. *BioEssays.* 2010 Sep;32(9):748–55.
- 342 [8] Verdejo-García A, Bechara A, Recknor EC, Pérez-García M. Executive  
343 dysfunction in substance dependent individuals during drug use and abstinence:  
344 An examination of the behavioral, cognitive and emotional correlates of  
345 addiction. *J Int Neuropsychol Soc.* 2006 May;12(03).
- 346 [9] Goldstein RZ, Volkow ND. Dysfunction of the prefrontal cortex in addiction:  
347 Neuroimaging findings and clinical implications. *Nat Rev Neurosci.*  
348 2011;12(11):652–69.
- 349 [10] Kühn S, Gallinat J. Brain Structure and Functional Connectivity Associated  
350 With Pornography Consumption. *JAMA Psychiatry* [Internet]. 2014 Jul  
351 1;71(7):827. Available from:  
352 [http://archpsyc.jamanetwork.com/article.aspx?doi=10.1001/jamapsychiatry.201](http://archpsyc.jamanetwork.com/article.aspx?doi=10.1001/jamapsychiatry.2014.93)  
353 [4.93](http://archpsyc.jamanetwork.com/article.aspx?doi=10.1001/jamapsychiatry.2014.93)
- 354 [11] Kühn S, Gallinat J. Brains online: Structural and functional correlates of  
355 habitual Internet use. *Addict Biol.* 2015;20(2):415–22.



- 356 [12] Owens EW, Behun RJ, Manning JC, Reid RC. The Impact of Internet  
357 Pornography on Adolescents: A Review of the Research. *Sex Addict*  
358 *Compulsivity*. 2012;19(1–2):99–122.
- 359 [13] Kufahl PR, Li Z, Risinger RC, Rainey CJ, Wu G, Bloom AS, et al. Neural  
360 responses to acute cocaine administration in the human brain detected by fMRI.  
361 *Neuroimage*. 2005 Dec;28(4):904–14.
- 362 [14] Kufahl P, Li Z, Risinger R, Rainey C, Piacentine L, Wu G, et al. Expectation  
363 modulates human brain responses to acute cocaine: A functional magnetic  
364 resonance imaging study. *Biol Psychiatry*. 2008 Jan;63(2):222–30.
- 365 [15] Fuster JM. The prefrontal cortex. In: *The Prefrontal Cortex*. 5th ed. Elsevier;  
366 2015. p. 1–8.
- 367 [16] Alexander GE, DeLong MR, Strick PL. Parallel organization of functionally  
368 segregated circuits linking basal ganglia and cortex. *Annu Rev Neurosci*. 1986  
369 Mar;9(1):357–81.
- 370 [17] Cummings JL. Frontal-subcortical circuits and human behavior. *Arch Neurol*.  
371 1993 Aug;50(8):873–80.
- 372 [18] Tekin S, Cummings JL. Frontal-subcortical neuronal circuits and clinical  
373 neuropsychiatry: An update. *J Psychosom Res*. 2002 Aug;53(2):647–54.
- 374 [19] Yayasan Kita dan Buah Hati. Measuring tool for early detection of  
375 pornography addiction. [Alat ukur deteksi dini adiksi pornografi Yayasan Kita  
376 dan Buah Hati]. Jakarta; 2017.
- 377 [20] Dronkers NF, Plaisant O, Iba-Zizen MT, Cabanis EA. Paul Broca’s historic  
378 cases: High resolution MR imaging of the brains of Leborgne and Lelong.  
379 *Brain*. 2007 Apr;130(5):1432–41.
- 380 [21] Weinstein A, Lejoyeux M. New developments on the neurobiological and

- 381 pharmacogenetic mechanisms underlying Internet and videogame addiction.  
382 *Am J Addict.* 2015 Mar;24(2):117–25.
- 383 [22] Vijayakumar N, Whittle S, Yücel M, Dennison M, Simmons J, Allen NB.  
384 Thinning of the lateral prefrontal cortex during adolescence predicts emotion  
385 regulation in females. *Soc Cogn Affect Neurosci.* 2014 Nov;9(11):1845–54.
- 386 [23] Rudick RA, Fisher E, Lee JC, Simon J, Jacobs L. Use of the brain parenchymal  
387 fraction to measure whole brain atrophy in relapsing-remitting MS. Multiple  
388 Sclerosis Collaborative Research Group. *Neurology.* 1999 Nov;53(8):1698–  
389 704.
- 390 [24] Fischl B. *FreeSurfer.* *Neuroimage.* 2012;62(2):774–81.
- 391 [25] Zheng W, Chee MWL, Zagorodnov V. Improvement of brain segmentation  
392 accuracy by optimizing non-uniformity correction using N3. *Neuroimage.*  
393 2009;48(1):73–83.
- 394 [26] Matthews JNS, Altman DG. Statistics notes: Interaction 2: compare effect sizes  
395 not P values. *BMJ.* 1996 Sep;313(7060):808–808.
- 396 [27] Ko C-H, Liu G-C, Hsiao S, Yen J-Y, Yang M-J, Lin W-C, et al. Brain  
397 activities associated with gaming urge of online gaming addiction. *J Psychiatr*  
398 *Res.* 2009 Apr;43(7):739–47.
- 399 [28] Zubieta J-K, Heitzeg MM, Xu Y, Koeppel RA, Ni L, Guthrie S, et al. Regional  
400 cerebral blood flow responses to smoking in tobacco smokers after overnight  
401 abstinence. *Am J Psychiatry.* 2005 Mar;162(3):567–77.
- 402 [29] Kaufman JN, Ross TJ, Stein EA, Garavan H. Cingulate hypoactivity in cocaine  
403 users during a GO-NOGO task as revealed by event-related functional  
404 magnetic resonance imaging. *J Neurosci.* 2003 Aug;23(21):7839–43.
- 405 [30] Fu L, Bi G, Zou Z, Wang Y, Ye E, Ma L, et al. Impaired response inhibition

- 406 function in abstinent heroin dependents: An fMRI study. *Neurosci Lett*. 2008  
407 Jun;438(3):322–6.
- 408 [31] Casey BJ, Jones RM, Hare TA. The adolescent brain. *Ann N Y Acad Sci*. 2008  
409 Mar;1124(1):111–26.
- 410 [32] Ismail FY, Fatemi A, Johnston M V. Cerebral plasticity: Windows of  
411 opportunity in the developing brain. *Eur J Paediatr Neurol*. 2017 Jan;21(1):23–  
412 48.
- 413
- 414

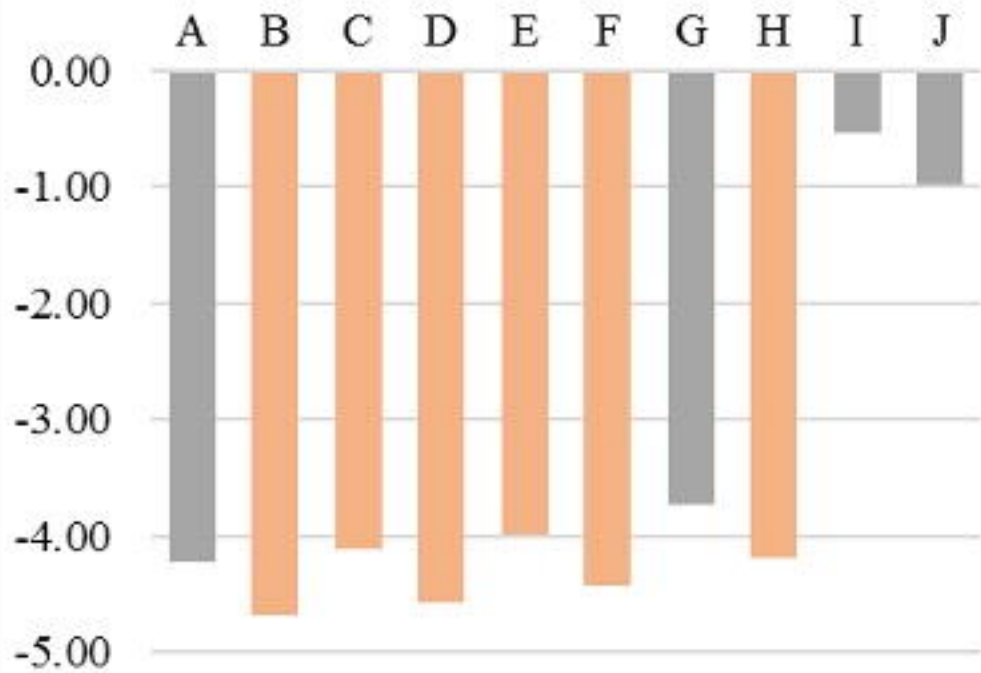

Source: https://www.medrxiv.org/content/10.1101/2021.06.22.21259291v1.full.pdf
