# Supplementary material for: Prefrontal Cortex Definitions and Their Use in Distinguishing Pornography Addicted Juveniles
Source: bioRxiv or medRxiv preprint supplement (doi:10.1101/2021.06.22.21259291), 2021-06-25
Supplement: Supplementary file [file media-1.pdf]

1 **Table S1. Each of questionnaire's components' mean and concurrent validity, averse to**  
 2 **the three-step-norm.** To confirm the screening result, the 92-item questionnaire was  
 3 followed by interview as qualitative input and also questionnaire about children tendencies in  
 4 sexual activities (Table S2), namely the three-step-norm. Its validity and reliability were  
 5 demonstrated by confirmatory factor analysis (CFA > 1.96) and Cronbach's Alpha (0.903;  
 6 CA > 0.7) values.

7

| No. | Components                                        | Mean ± SD     | K-S p-value | p-value* |
|-----|---------------------------------------------------|---------------|-------------|----------|
| 1   | Sexual activities tendencies                      | 11.20 ± 11.20 | 0.000       | 0.023**  |
| 2   | Number of times, frequency,<br>and duration spent | 14.60 ± 2.54  | 0.121       | 0.013**  |
| 3   | Motivation to use<br>pornography                  | 20.50 ± 4.68  | 0.002       | 0.009**  |
| 4   | Problematic pornography use                       | 69.55 ± 10.34 | 0.000       | 0.001**  |
| 5   | Total score                                       | 79.85 ± 30.01 | 0.858       | 0.000**  |

8 \*Unpaired t-test as the parametric test and Mann-Whitney as the non-parametric test.

9 \*\*Statistically significant (p < 0.05)

10

11
