# Supplementary material for: Prefrontal Cortex Definitions and Their Use in Distinguishing Pornography Addicted Juveniles
Source: bioRxiv or medRxiv preprint supplement (doi:10.1101/2021.06.22.21259291), 2021-06-25
Supplement: Supplementary file [file media-2.pdf]

1 **Table S2. Questionnaire of children tendencies in sexual activities.** In a scale of 1 to 5, it  
2 ranges from never to very frequent with minimum score of 11 and maximum score of 55.

---

| No. | Components                                       |
|-----|--------------------------------------------------|
| 1   | Masturbation                                     |
| 2   | Embracing                                        |
| 3   | Holding hands                                    |
| 4   | Spend time together alone                        |
| 5   | Kissing                                          |
| 6   | Hugging                                          |
| 7   | Laying down together                             |
| 8   | Partner's hands touching you in your attire      |
| 9   | Your hands touching your partner in their attire |
| 10  | Laying down without clothes                      |
| 11  | Having sex                                       |

---

3

4
